# Supplementary material for: Risk factors for carbapenem-resistant Enterobacteriaceae infections: a French case-control-control study
Source: Springer Nature journal article supplement (doi:10.1007/s10096-018-3438-9), 2018-11-28
Supplement: MOESM1 [file 16301242]

**Risk factors for carbapenem-resistant Enterobacteriaceae infections: a French case-control-control study**

Marie-Hélène Nicolas-Chanoine a, b *, Marie Vigan c, d, Cédric Laouénan b, c, d, Jérôme Robert e, f, and on behalf of the “E-carb Study Group” g

a Service de Microbiologie, Hôpital Beaujon, AP-HP, F- 92110 Clichy, France,

b INSERM and University Paris Diderot, IAME, UMR 1137, F-75018 Paris, France,

c Department of Epidemiology, Biostatistic and Clinical Research, Bichat Hospital, AP-HP, F-75018 Paris, France,

d INSERM, CIC-EC 1425, Bichat Hospital, AP-HP, F-75018 Paris, France,

e Sorbonne Université, Centre d’Immunologie et des Maladies Infectieuses, CIMI-Paris, Team E13 (Bacteriology), CR7, INSERM, U1135, F-75013 Paris, France

f AP-HP, Hôpitaux Universitaires Pitié Salpêtrière-Charles Foix, Bacteriology and Hygiene, F-75013 Paris, France

g Members of “The E-carb Study Group” are given at the end of the article

* Correspondence: marie-helene.nicolas-chanoine@inserm.fr

Univariate analyses of demographic-, lifestyle-, medical history- and current hospitalisation-related factors associated with a carbapenemase-producing Enterobacteriaceae (CPE) isolate (Tables S1, S2 and S3) and with a non-carbapenemase-producing Enterobacteriaceae (non-CPE) isolate (Tables S4, S5 et S6)

**Table S1. Univariate analysis of** **demographic and lifestyle-related factors associated with** **a carbapenemase-producing Enterobacteriaceae (CPE) isolate in the subpopulation of cases with a CPE isolate compared with their controls C1 (patients with a carbapenem-susceptible Enterobacteriaceae isolate) and C2 (patients with culture-negative samples)**

| **Factor** | **Case: 39**  **No. (%)** | **C1: 39**  **No. (%)** | **Odds ratio**  **(95% CI)** | **P**  **value** | **Case: 36**  **No. (%)** | **C2: 36**  **No. (%)** | **Odds ratio**  **(95% CI)** | **P**  **value** |
| --- | --- | --- | --- | --- | --- | --- | --- | --- |
| *Demographic data* |  |  |  |  |  |  |  |  |
| Age (mean ± SD) in years | 60 ± 16.8 | 65 ± 20.1 | 0.99 (0.96-1.0) | 0.3 | 59 ± 17.0 | 59± 17.4 | 1.0 (0.9-1.0) | 1 |
| Male gender | 24 (62) | 21 (54) | 1.3 (0.6-3.2) | 0.5 | 24 (67) | 23 (64) | 1.1 (0.4-2.9) | 0.8 |
| Country of birth |  |  |  | 0.3 |  |  |  | 0.6 |
| - France | 26 (67) | 31 (79) | 1 | 24 (67) | 26 (72) | 1 |
| - Other Europe country | 3 (8) | 1 (3) | 4.4 (0.4-48.5) | 3 (8) | 1 (3) | 3.3 (0.3-34.6) |
| - Country outside Europe | 10 (26) | 7 (18) | 2.0 (0.6-6.8) | 9 (25) | 9 (25) | 1.2 (0.4-4.0) |
| Living in France | 35 (90) | 38 (97) | 0.3 (0.03-2.2) | 0.2 | 32 (89) | 35 (97) | 0.3 (0.03-2.2) | 0.2 |
| *Lifestyle* |  |  |  |  |  |  |  |  |
| Housing |  |  |  |  |  |  |  |  |
| - Individual housing | 35 (90) | 36 (92) | 1 | 0.9 | 32 (89) | 36 (100) | 1 | 1 |
| - Collective housing | 2 (5) | 3 (8) | 0.7 (0.1-4.0) |  | 2 (6) | 0 (0.0) | - |  |
| - Homeless | 2 (5) | 0 (0.0) | - | 2 (6) | 0 (0.0) | - |
| Live alone | 11 (30) | 9 (24) | 1.4 (0.4-4.4) | 0.6 | 10 (29) | 9 (25) | 1.2 (0.4-3.5) | 0.8 |
| Household hospitalization in the preceding 6 months | 1 (4) | 1 (4) | 1.0 (0.06-16.0) | 1 | 1 (4) | 1 (4) | 1.0 (0.06-16.0) | 1 |
| Household working in a medical center | 4 (15) | 2 (8) | - | 1 | 4 (17) | 0 (0.0) | - | 1 |
| Functionally independent before hospitalisation. | 33 (85) | 30 (77) | 2.0 (0.5-8.0) | 0.3 | 31 (86) | 31(86) | 1.0 (0.2-5.0) | 1 |
| Occupational status |  |  |  |  |  |  |  |  |
| - Working | 14 (36) | 7 (18) | 1 | 0.2 | 14 (39) | 12 (33) | 1 | 0.9 |
| - Student | 0 (0) | 0 (0) | - |  | 0 (0) | 1 (3) | - |  |
| - Unemployed | 7 (18) | 3 (8) | 0.9 (0.1-6.8) |  | 7 (19) | 4 (11) | 1.3 (0.3-6.2) |  |
| - Retirement | 18 (46) | 26 (67) | 0.3 (0.0.8-1.1) |  | 15 (42) | 18 (50) | 0.6 (0.2-2.0) |  |
| - Other | 0 (0) | 3 (8) | - |  | 0 (0) | 1 (3) | - |  |
| With pets | 12 (31) | 16 (41) | 0.6 (0.2-1.6) | 0.3 | 11 (31) | 12 (33) | 0.9 (0.3-2.6) | 0.8 |
| **Table S1, continued** |  |  |  |  |  |  |  |  |
| Patient travel abroad in the preceding 12 months |  |  |  |  |  |  |  |  |
| - Yes, in Europe | 6 (15) | 4 (10) | 1.7 (0.4-7.0) | 0.5 | 6 (17) | 5 (14) | 1.3 (0.3-4.7) | 0.7 |
| - Yes, in Asia | 6 (15) | 1 (3) | 6.0 (0.7-49.8) | 0.1 | 6 (17) | 0 (0) | - |  |
| - Yes, in Africa | 7 (18) | 5 (13) | 1.4 (0.4-4.4) | 0.6 | 7 (19) | 6 (17) | 1.2 (0.4-3.4) | 0.8 |
| - Yes, in America | 3 (8) | 2 (5) | 1.5 (0.3-9.0) | 0.7 | 3 (8) | 0 (0) | - |  |
| If travel, accommodation |  |  |  |  |  |  |  |  |
| - In the family/home stay | 11 (29) | 5 (13) | 2.7 (0.7-10.1) | 0.1 | 11 (31) | 6 (17) | 2.0 (0.7-5.9) | 0.2 |
| - In hotel | 7 (18) | 4 (11) | 1.5 (0.4-5.3) | 0.5 | 7 (20) | 4 (11) | 4.0 (0.4-35.8) | 0.2 |
| Household travel abroad in the preceding 12 months |  |  |  |  |  |  |  |  |
| - Yes, in Europe | 3 (8) | 2 (5) | 1.5 (0.3-9.0) | 0.7 | 2 (6) | 5 (14) | 0.4 (0.1-2.1) | 0.3 |
| - Yes, in Asia | 4 10) | 2 (5) | 2.0 (0.4-10.9) | 0.4 | 4 (11) | 1 (3) | 4.0 (0.4-35.8) | 0.2 |
| - Yes, in Africa | 2 (5) | 6 (15) | 0.3 (0.1-1.7) | 0.2 | 1 (3) | 3 (8) | 0.3 (0.04-3.2) | 0.3 |
| - Yes, in America | 2 (5) | 2 (5) | 1.0 (0.1-7.1) | 1 | 2 (6) | 0 (0) | - |  |
| If travel, accommodation |  |  |  |  |  |  |  |  |
| - In the family/home stay | 5 (13) | 5 (13) | 1.0 (0.3-4.0) | 1 | 5 (14) | 4 (11) | 1.3 (0.3-6.0) | 0.7 |
| - In hotel | 4 (10) | 3 (8) | 1.3 (0.3-6.0) | 0.7 | 3 (8) | 4 (11) | 0.7 (0.1-4.0) | 0.7 |

**Table S2. Univariate analysis of** **medical history-related factors associated with a carbapenemase-producing Enterobacteriaceae (CPE) isolate in the subpopulation of cases with a CPE isolate compared with their controls C1 (patients with a carbapenem-susceptible Enterobacteriaceae isolate) and C2 (patients with culture-negative samples)**

| **Factor** | **Case: 39**  **No. (%)** | **C1: 39**  **No. (%)** | **Odds ratio**  **(95% CI)** | **P**  **value** | **Case: 36**  **No. (%)** | **C2: 36**  **No. (%)** | **Odds ratio**  **(95% CI)** | **P**  **value** |
| --- | --- | --- | --- | --- | --- | --- | --- | --- |
| *Medical history* |  |  |  |  |  |  |  |  |
| Hospitalisation in the preceding 12 months (Number) |  |  |  |  |  |  |  |  |
| - 0 | 8 (21) | 20 (51) | 1 | 0.04 | 8 (22) | 14 (41) | 1 | 0.2 |
| - 1 | 18 (46) | 8 (21) | 5.5 (1.4-20.7) | 16 (45) | 11 (32) | 2.8 (0.8-9.3) |
| - ≥2 | 13 (33) | 11 (28) | 2.2 (0.7-7.2) | 12 (33) | 9 (27) | 2.1 (0.6-7.1) |
| Hospitalisation location |  |  |  |  |  |  |  |  |
| - No hospitalisation | 8 (21) | 20 (51) | 1 | 0.1 | 8 (22) | 14 (40) | 1 | 0.08 |
| - In France | 24 (61) | 18 (46) | 3.0 (1.1-8.3) | 21 (58) | 19 (54) | 2.2 (0.8-6.4) |
| - Outside of France | 7 (18) | 1 (3) | - | 7 (19) | 2 (6) | 12.3 (1.2-127.2.) |
| In the preceding 6 months |  |  |  |  |  |  |  |  |
| - Mechanical ventilation | 9 (23) | 2 (5) | 4.5 (0.9-20.8) | 0.05 | 9 (25) | 0 (0) | - | 1 |
| - Urine drainage | 7 (18) | 9 (23) | 0.8 (0.3-2.2) | 0.6 | 7 (19) | 3 (8) | 5.0 (0.6-42.8) | 0.1 |
| - Intravascular devices | 24 (62) | 20 (51) | 1.6 (0.6-4.1) | 0.3 | 21 (58) | 20 (56) | 1.3 (0.3-4.7) | 0.7 |
| - Colonoscopy, endoscopy | 16 (42) | 17 (44) | 0.9 (0.3-2.4) | 0.8 | 16 (44) | 16 (44) | 1.0 (0.4-2.9) | 1 |
| Surgery during the preceding12 months | 9 (23) | 7 (18) | 1.5 (0.4-5.3) | 0.5 | 8 (22) | 8 (22) | 1.0 (0.3-3.1) | 1 |
| Infection in the preceding 3 months | 20 (51) | 15 (39) | 1.7 (0.7-4.4) | 0.3 | 18 (50) | 10 (28) | 2.6 (0.9-7.3) | 0.07 |
| Antibiotic receipt in the month preceding the current hospitalisation | 18 (46) | 13 (34) | 1.7 (0.7-4.4) | 0.3 | 17 (47) | 8 (22) | 4.0 (1.1-14.2) | 0.03 |
| Nursing or physiotherapy in the month preceding the current hospitalisation. | 11 (28) | 17 (44) | 0.5 (0.2-1.3) | 0.1 | 10 (28) | 6 (18) | 2.0 (0.6-6.6) | 0.3 |

**Table S3. Univariate analysis of current hospitalisation-related factors associated with a a carbapenemase-producing Enterobacteriaceae (CPE) isolate in the subpopulation of cases with a CPE isolate compared with their controls C1 (patients with a carbapenem-susceptible Enterobacteriaceae isolate) and C2 (patients with culture-negative samples)**

| **Factor** | **Case: 39**  **No. (%)** | **C1: 39**  **No. (%)** | **Odds ratio**  **(95% CI)** | **P**  **value** | **Case: 36**  **No. (%)** | **C2: 36**  **No. (%)** | **Odds ratio**  **(95% CI)** | **P**  **value** |
| --- | --- | --- | --- | --- | --- | --- | --- | --- |
| *Current hospitalisation* |  |  |  |  |  |  |  |  |
| Transferred from a hospital located in France | 11 (28) | 7 (18) | 2.3 (0.6-9.0) | 0.2 | 11 (31) | 6 (17) | 2.3 (0.7-7.3) | 0.2 |
| Transferred from a hospital located outside of France | 4 (11) | 1 (3) | 4.0 (0.4-35.8) | 0.2 | 4 (12) | 2 (6) | 1.5 (0.3-9.0) | 0.7 |
| Stay in another hospital ward before the current ward |  |  |  |  |  |  |  |  |
| - None | 20 (54) | 25 (64) | 1 | 0.9 | 20 (59) | 23 (70) | 1 | 0.7 |
| - Medicine, paediatric, rehabilitation | 9 (24) | 9 (23) | 1.3 (0.4-4.6) | 9 (26) | 7 (21) | 1.5 (0.4-5.3) |
| - Surgery | 5 (14) | 1 (3) | - | 2 (6) | 2 (6) | 0.8 (0.1-10.1) |
| - Intensive care | 3 (8) | 4 (10) | 0.8 (0.1-5.4) | 3 (9) | 1 (3) | 2.8 (0.3-29.3) |
| Intravascular devices | 35 (90) | 34 (87) | 1.3 (0.3-6.0) | 0.7 | 32 (89) | 29 (81) | 2.0 (0.5-8.0) | 0.3 |
| Urine drainage | 21 (54) | 19 (50) | 1.1 (0.4-3.2) | 0.8 | 20 (56) | 12 (33) | 3.7 (1.0-13.1) | 0.05 |
| Mechanical ventilation | 6 (15) | 6 (15) | 1.0 (0.1-7.1) | 1 | 5 (14) | 4 (11) | 1.5 (0.3-9.0) | 0.7 |
| Immunocompromised | 10 (26) | 10 (26) | 0.9 (0.3-2.4) | 0.8 | 8 (22) | 11 (31) | 0.7 (0.2-1.9) | 0.4 |
| Antibiotic receipt between the admission and the pre-inclusion | 23 (59) | 17 (45) | 2.0 (0.7-5.9) | 0.2 | 21 (58) | 8 (22) | 7.5 (1.7-32.8) | 0.007 |
| Hospitalisation ward |  |  |  |  |  |  |  |  |
| - Medicine, paediatric, rehabilitation | 26 (67) | 27 (69) | 1 | 1 | 24 (67) | 25 (69) | 1 | 0.8 |
| - Surgery | 6 (15) | 5 (13) | - |  | 6 (17) | 5 (14) | 2.3 (02-33.2) |  |
| - Intensive care | 7 (18) | 7 (18) | - |  | 6 (17) | 6 (17) | 1.5 (0.07-34.8) |  |

**Table S4.** **Univariate analysis of demographic and lifestyle-related factors associated with a non-carbapenemase-producing Enterobacteriaceae (non-CPE) clinical isolate in the subpopulation of cases with a CPE isolate compared with their controls C1 (patients with a carbapenemase-susceptible isolate) and C2 (patients with negative clinical samples)**

| **Factor** | **Case: 121**  **No. (%)** | **C1: 121**  **No. (%)** | **Odds ratio**  **(95% CI)** | **P**  **value** | **Case: 112**  **No. (%)** | **C2: 112**  **No. (%)** | **Odds ratio**  **(95% CI)** | **P**  **value** |
| --- | --- | --- | --- | --- | --- | --- | --- | --- |
| *Demographic data* |  |  |  |  |  |  |  |  |
| Age (mean ± SD) in years | 63 ± 19 | 63 ± 18 | 0.99 (0.98-1.0) | 0.9 | 61 ± 19.1 | 62 ± 16.3 | 1.0 (0.98 – 1.0) | 0.9 |
| Male gender | 85 (70.3) | 69 (57.0) | 1.9 (1.1-3.3) | 0.03 | 81 (72.3) | 66 (58.9) | 1.9 (1.0 - 3.4) | 0.04 |
| Country of birth |  |  |  |  |  |  |  |  |
| - France | 95 (78.5) | 97 (80.2) | 1 | 0.9 | 86 (76.8) | 87 (77.7) | 1 | 0.7 |
| - Other Europe country | 17 (14.0) | 16 (13.2) | 1.1 (0.5 – 2.5) |  | 17 (15.2) | 19 (17.0) | 0.9 (0.5 – 1.9) |  |
| - Country outside Europe | 9 (7.5) | 8 (6.6) | 1.1 (0.4 – 3.0) |  | 9 (8.0) | 6 (5.3) | 1.5 (0.5 – 4.2) |  |
| Living in France | 118 (97.5) | 118 (97.5) | 1.0 (0.1-7.1) | 1 | 109 (97.3) | 109 (97.3) | 1.0 (0.2 – 5.0) | 1 |
| *Lifestyle* |  |  |  |  |  |  |  |  |
| Housing |  |  |  |  |  |  |  |  |
| - Individual housing | 115 (95.0) | 114 (94.2) | 1 | 0.4 | 106 (94.6) | 110 (98.2) | 1 | 0.9 |
| - Collective housing | 5 (4.1) | 3 (2.5) | 1.7 (0.4 – 7.0) |  | 5 (4.5) | 0 (0) | - |  |
| - Homeless | 1 (0.9) | 4 (3.3) | 0.3 (0.03-2.2) | 1 (0.9) | 2 (1.8) | 0.5 (0.05 – 5.5) |
| Live alone | 24 (20.5) | 31 (26.5) | 0.8 (0.4-1.4) | 0.4 | 23 (21.3) | 30 (26.8) | 0.8 (0.4 – 1.4) | 0.4 |
| Household hospitalization in the preceding 6 months | 10 (10.9) | 10 (11.69) | 0.6 (0.2 – 1.9) | 0.4 | 9 (10.7) | 6 (7.4) | 1.8 (0.5 – 6.0) | 0.4 |
| Household working in a medical center | 5 (5.6) | 5 (4.8) | 1.3 (0.3 – 6.0) | 0.7 | 5 (6.2) | 5 (6.3) | 1.3 (0.3 – 6.0) | 0.7 |
| Functionally independent before hospitalisation. | 98 (81.0) | 96 (79.3) | 1.1 (0.6 – 2.2) | 0.7 | 92 (82.1) | 101 (90.2) | 0.5 (0.2 – 1.1) | 0.08 |
| Occupational status |  |  |  |  |  |  |  |  |
| - Working | 32 (26.5) | 29 (24.0) | 1 | 0.8 | 35 (31.3) | 36 (32.4) | 1 | 0.5 |
| - Student | 5 (4.1) | 3 (2.5) | 1.8 (0.3 – 11.1) |  | 5 (4.5) | 1 (1.8) | 4.7 (0.5 – 45.5) |  |
| - Unemployed | 14 (11.6) | 13 (10.7) | 1.1 (0.4 – 2.6) |  | 12 (10.7) | 10 (9.0) | 1.4 (0.5 – 3.6) |  |
| - Retirement | 65 (53.7) | 68 (56.2) | 0.9 (0.5 -1.6) |  | 57 (50.9) | 56 (50.5) | 1.0 (0.6 – 1.8) |  |
| - Other | 5 (4.1) | 8 (6.6) | 0.6 (0.1 – 2.1) |  | 3 (2.7) | 7 (6.3) | 0.5 (0.1 – 1.8) |  |
| With pets | 45 (37.2) | 49 (40.5) | 0.8 (0.5 – 1.5) | 0.6 | 37 (33.0) | 42 (37.5) | 0.8 (0.5 – 1.5) | 0.5 |
| **Table S4, continued** |  |  |  |  |  |  |  |  |
| Patient travel abroad in the preceding 12 months |  |  |  |  |  |  |  |  |
| - Yes, in Europe | 13 (10.8) | 15 (12.47) | 0.8 (0.4 – 1.9) | 0.7 | 14 (12.6) | 15 (13.6) | 0.9 (0.4 – 2.0) | 0.8 |
| - Yes, in Asia | 4 (3.3) | 2 (1.7) | 3.0 (0.3 – 28.8) | 0.3 | 5 (4.5) | 3 (2.7) | 1.7 (0.4 – 7.0) | 0.5 |
| - Yes, in Africa | 6 (5.0) | 15 (12.4) | 0.4 (0.1 – 1.0) | 0.048 | 6 (5.4) | 12 (10.9) | 0.4 (0.1 – 1.2) | 0.1 |
| - Yes, in America | - | - | - | - | 0 (0) | 2 (1.8) | - | 1 |
| If travel, accommodation |  |  |  |  |  |  |  |  |
| - In the family/home stay | 11 (9.2) | 22 (18.3) | 0.4 (0.2 – 1.0) | 0.04 | 12 (10.9) | 18 (16.5) | 0.5 (0.2 – 1.2) | 0.1 |
| - In hotel | 9 (7.6) | 9 (7.5) | 1.1 (0.4 – 3.2) | 0.8 | 10 (9.1) | 11 (10.1) | 0.9 (0.4 – 2.2) | 0.8 |
| Household travel abroad in the preceding 12 months |  |  |  |  |  |  |  |  |
| - Yes, in Europe | 13 (10.8) | 15 (12.6) | 0.8 (0.43 – 1.9) | 0.7 | 12 (10.8) | 19 (17.1) | 0.6 (0.3 – 1.3) | 0.2 |
| - Yes, in Asia | 5 (4.2) | 2 (1.7) | 2.5 (0.5 – 12.9) | 0.3 | 5 (4.5) | 4 (3.6) | 1.3 (0.3 – 6.0) | 0.7 |
| - Yes, in Africa | 6 (5.0) | 8 (6.7) | 0.7 ( 0.2 – 2.4) | 0.5 | 6 (5.4) | 10 (9.0) | 0.6 (0.2 – 1.7) | 0.3 |
| - Yes, in America | 2 (1.7) | 5 (4.2) | 0.4 (0.08 – 2.1) | 0.3 | 2 (1.8) | 2 (1.8) | 1.0 (0.1 – 7.1) | 1 |
| If travel, accommodation |  |  |  |  |  |  |  |  |
| - In the family/home stay | 11 (9.2) | 15 (12.8) | 0.6 (0.3 – 1.5) | 0.3 | 11 (10.0) | 15 (13.4) | 0.7 (0.3 – 1.6) | 0.4 |
| - In hotel | 12 (10.1) | 10 (8.6) | 1.3 (0.5 – 3.2) | 0.6 | 11 (10.0) | 17 (15.2) | 0.6 (0.3 – 1.4) | 0.2 |

**Table S5. Univariate analysis of demographic and lifestyle-related factors associated with a non-carbapenemase-producing Enterobacteriaceae (non-CPE) clinical isolate in the subpopulation of cases with a CPE isolate compared with their controls C1 (patients with a carbapenemase-susceptible isolate) and C2 (patients with negative clinical samples)**

| **Factor** | **Case: 121**  **No. (%)** | **C1: 121**  **No. (%)** | **Odds ratio**  **(95% CI)** | **P**  **value** | **Case: 112**  **No. (%)** | **C2: 112**  **No. (%)** | **Odds ratio**  **(95% CI)** | **P**  **value** |
| --- | --- | --- | --- | --- | --- | --- | --- | --- |
| *Medical history* |  |  |  |  |  |  |  |  |
| Hospitalisation in the preceding 12 months (Number) |  |  |  |  |  |  |  |  |
| - 0 | 34 (29.6) | 52 (43.4) | 1 | 0.04 | 33 (31.4) | 44 (40.4) | 1 | 0.2 |
| - 1 | 32 (27.8) | 34 (28.3) | 1.7 (0.8 -3.5) | 28 (26.7) | 34 (31.2) | 1.01 (0.5 – 2.1) |
| - ≥2 | 49 (42.6) | 34 (28.3) | 2.4 (1.2 – 4.6) | 44 (41.9) | 31 (28.4) | 1.8 (0.9 – 3.8) |
| Hospitalisation location |  |  |  |  |  |  |  |  |
| - No hospitalisation | 34 (28.1) | 52 (43.0) | 1 | 0.02 | 33 (29.5) | 44 (39.3) | 1 | 0.2 |
| - In France | 86 (71.1) | 66 (54.6) | 2.2 (1.2 – 4.0) | 78 (69.6) | 66 (58.9) | 1.7 (0.9 – 3.0) |
| - Outside of France | 1 (0.8) | 3 (2.5) | 0.5 (0.05 – 4.8) | 1 (0.9) | 2 (1.8) | 0.6 (0.05 – 6.6) |
| In the preceding 6 months |  |  |  |  |  |  |  |  |
| - Mechanical ventilation | 17 (14.4) | 17 (14.2) | 1.3 (0.5 – 3.5) | 0.6 | 14 (12.8) | 7 (6.3) | 2.6 (0.9 – 7.3) | 0.07 |
| - Urine drainage | 34 (28.8) | 29 (24.2) | 1.4 (0.7 – 2.7) | 0.4 | 33 (30.3) | 21 (18.8) | 1.9 (1.0 – 3.7) | 0.05 |
| - Intravascular devices | 70 (58.3) | 49 (41.2) | 2.2 (1.2 – 3.9) | 0.008 | 64 (57.7) | 56 (50.0) | 1.4 (0.8 – 2.4) | 0.3 |
| - Colonoscopy, endoscopy | 49 (42.2) | 39 (32.7) | 1.8 (0.9 – 3.7) | 0.09 | 49 (45.8) | 42 (37.5) | 1.4 (0.8 – 2.6) | 0.2 |
| Surgery during the preceding12 months | 37 (31.1) | 31 (25.8) | 1.5 (0.8 – 2.8) | 0.3 | 31 (28.2) | 23 (20.5) | 1.6 (0.8 – 3.2) | 0.1 |
| Infection in the preceding 3 months | 64 (52.9) | 43 (35.8) | 2.9 (1.5 – 5.8) | 0.002 | 60 (53.6) | 34 (30.4) | 2.7 (1.5 – 4.9) | 0.0009 |
| Antibiotic receipt in the month preceding the current hospitalisation | 42 (36.2) | 28 (23.7) | 2.1 (1.1 – 4.0) | 0.02 | 40 (37.4) | 26 (23.9) | 2.0 (1.1 – 3.7) | 0.03 |
| Nursing or physiotherapy in the month preceding the current hospitalisation. | 52 (44.8) | 39 (33.1) | 1.8 (0.9 – 3.3) | 0.06 | 47 (43.9) | 34 (30.6) | 2.2 (1.1 – 4.2) | 0.02 |

**Table S6. Univariate analysis of demographic and lifestyle-related factors associated with a non-carbapenemase-producing Enterobacteriaceae (non-CPE) clinical isolate in the subpopulation of cases with a CPE isolate compared with their controls C1 (patients with a carbapenemase-susceptible isolate) and C2 (patients with negative clinical samples)**

| **Factor** | **Case: 121**  **No. (%)** | **C1: 121**  **No. (%)** | **Odds ratio**  **(95% CI)** | **P**  **value** | **Case:112**  **No. (%)** | **C2: 112**  **No. (%)** | **Odds ratio**  **(95% CI)** | **P**  **value** |
| --- | --- | --- | --- | --- | --- | --- | --- | --- |
| *Current hospitalisation* |  |  |  |  |  |  |  |  |
| Transferred from a hospital located in France | 37 (30.6) | 24 (19.8) | 2.0 (1.0 – 3.9) | 0.04 | 35 (31.3) | 29 (25.9) | 1.4 (0.7 – 2.6) | 0.3 |
| Transferred from a hospital located outside of France | 0 (0) | 1 (0.9) | - | 1 | 0 (0) | 2 (1.9) | - | 1 |
| Stay in another hospital ward before the current ward |  |  |  |  |  |  |  |  |
| - None | 62 (51.7) | 71 (59.7) | 1 | 0.2 | 59 (53.2) | 61 (57.0) | 1 | 0.8 |
| - Medicine, paediatric, rehabilitation | 28 (23.3) | 18 (15.1) | 1.9 (0.9 – 4.0) | 24 (21.6) | 21 (19.6) | 1.1 (0.5 – 2.4) |
| - Surgery | 10 (8.3) | 15 (12.6) | 0.6 (0.2 – 1.9) | 9 (8.1) | 11 (10.3) | 0.9 ( 0.3 – 2.4) |
| - Intensive care | 20 (16.7) | 15 (12.6) | 1.7 (0.7 – 4.1) | 19 (17.1) | 14 (13.1) | 1.4 (0.6 – 3.3) |
| Intravascular devices | 107 (88.4) | 97 (80.8) | 1.9 (0.9 – 4.1) | 0.1 | 100 (89.3) | 87 (78.4) | 2.7 (1.1 – 6.5) | 0.02 |
| Urine drainage | 79 (65.8) | 73 (60.3) | 1.3 (0.7 – 2.5) | 0.4 | 74 (66.7) | 42 (37.5) | 3.5 (1.9 – 6.4) | 0.0001 |
| Mechanical ventilation | 32 (26.9) | 35 (29.2) | 0.9 (0.4 – 2.0) | 0.8 | 31 (28.2) | 17 (15.5) | 4.0 (1.5 – 10.7) | 0.006 |
| Immunocompromised | 38 (31.4) | 38 (31.4) | 1.0 (0.6 – 1.8) | 1 | 36 (32.1) | 45 (40.5) | 0.6 (0.3 – 1.2) | 0.2 |
| Antibiotic receipt between the admission and the pre-inclusion | 81 (68.1) | 66 (54.5) | 1.8 (1.0 – 3.0) | 0.04 | 75 (68.2) | 31 (28.4) | 5.6 (2.7 – 11.3) | <0.0001 |
| Hospitalisation ward |  |  |  |  |  |  |  |  |
| - Medicine, paediatric, rehabilitation | 59 (48.8) | 57 (47.1) | 1 | 1 | 50 (44.6) | 68 (60.7) | 0.5 (0.2 – 1.7) | 0.02 |
| - Surgery | 24 (19.8) | 26 (21.5) | - |  | 23 (20.5) | 20 (17.9) | 1 |  |
| - Intensive care | 38 (31.4) | 38 (31.4) | - |  | 39 (34.8) | 24 (21.4) | 8.7 (0.9 – 85.7) |  |
